# Supplementary material for: Association of Elevated Serum Aldosterone Concentrations in Pregnancy with Hypertension
Source: MDPI journal article supplement (doi:10.3390/biomedicines11112954), 2023-11-01
Supplement: s1 [file s1]

Supplementary Table S1: Concentrations of RAAS components measured a cohort of 128 patients in the first and third trimesters of pregnancy.

| RAAS Component           | 1 <sup>st</sup> Trimester<br>n=128 | 3 <sup>rd</sup> Trimester<br>n=128 |
|--------------------------|------------------------------------|------------------------------------|
| Median (IQR)             |                                    |                                    |
| Aldosterone, pmol/L      | 387.2 (204.3 - 705.1)              | 724.8 (376.6 - 1197)               |
| Angiotensin I, pmol/L    | 77.54 (47.31 - 112.1)              | 100.2 (58.90 - 151.8)              |
| Angiotensin II, pmol/L   | 164.9 (101.4 - 227.9)              | 158.2 (105.7 - 243.8)              |
| PRA-S, pmol/L            | 246.0 (152.9 - 353.1)              | 265.4 (174.6 - 397.0)              |
| AA2-R, (pmol/L)/(pmol/L) | 2.235 (1.317 - 4.150)              | 4.518 (2.663 - 7.308)              |
